# Supplementary material for: The Effects of Bariatric Procedures versus Medical Therapy for Obese Patients with Type 2 Diabetes: Meta-Analysis of Randomized Controlled Trials
Source: Hindawi journal article supplement (doi:10.1155/2013/410609), 2013-01-01
Supplement: f1 [file 410609.f1.pdf]

# Supplementary Appendix

## The effects of bariatric procedures versus medical therapy for obese patients with type 2 diabetes: a systematic review and meta-analysis of randomized controlled trials

Xiaohu Guo 1,2, Xiaoyan Liu 2, Mancai Wang 1,2, Fengxian Wei 1,2 Yawu Zhang 1,2, Youcheng Zhang 1,2\*,

The results of meta-analysis about diabetes remission, HbA1c, FBG, hypoglycemic, antihypertensive, lipid-lowering medications, weight loss, high-density lipoprotein, triglycerides and adverse events

1

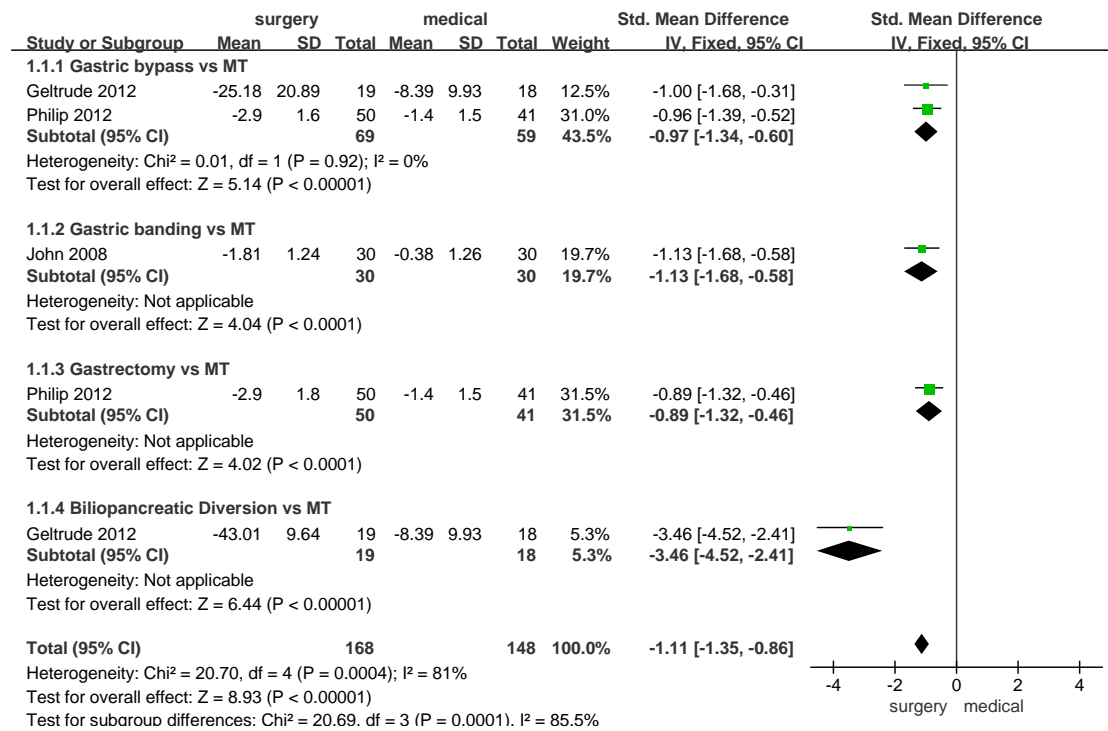

Fig. 2 Change of glycated hemoglobin

2

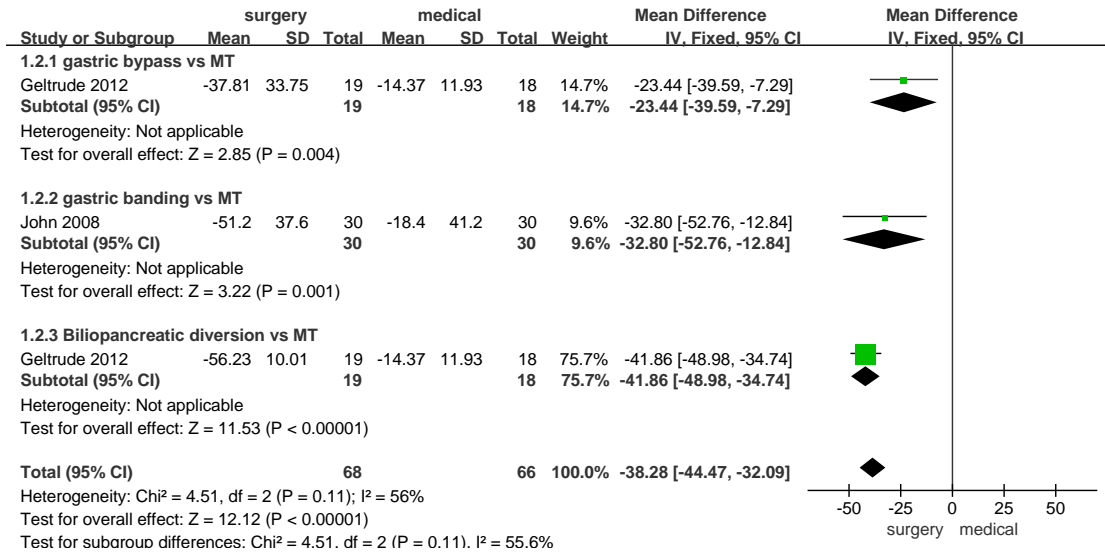

Fig. 3 Change of fasting blood glucose

3

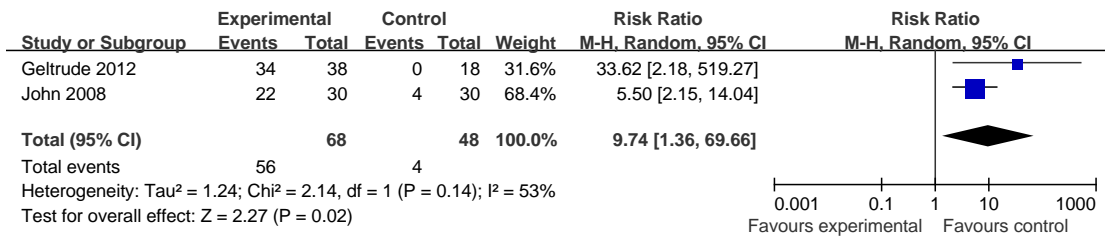

Fig. 4 Change of diabetes remission rates

4

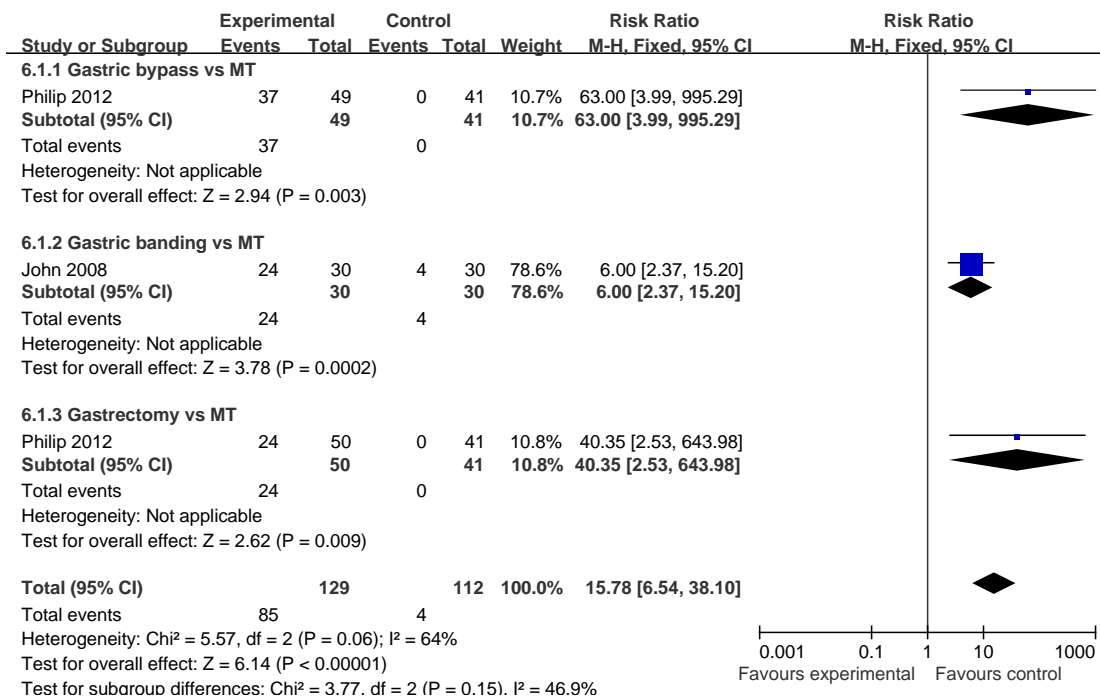

Fig. 5 Change of subjects without medication.

5

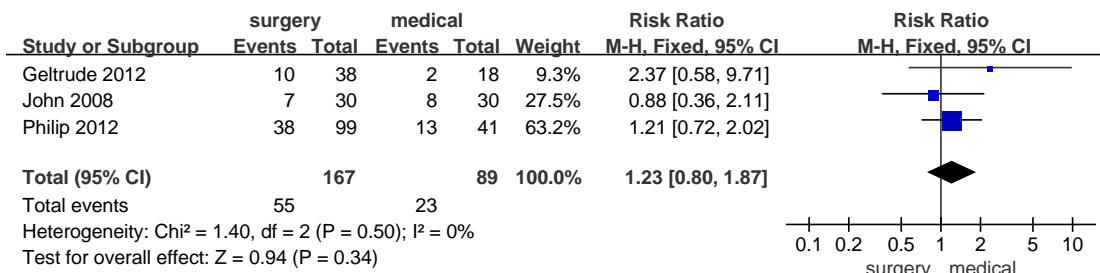

Fig. 6 Change of serious adverse events.

6

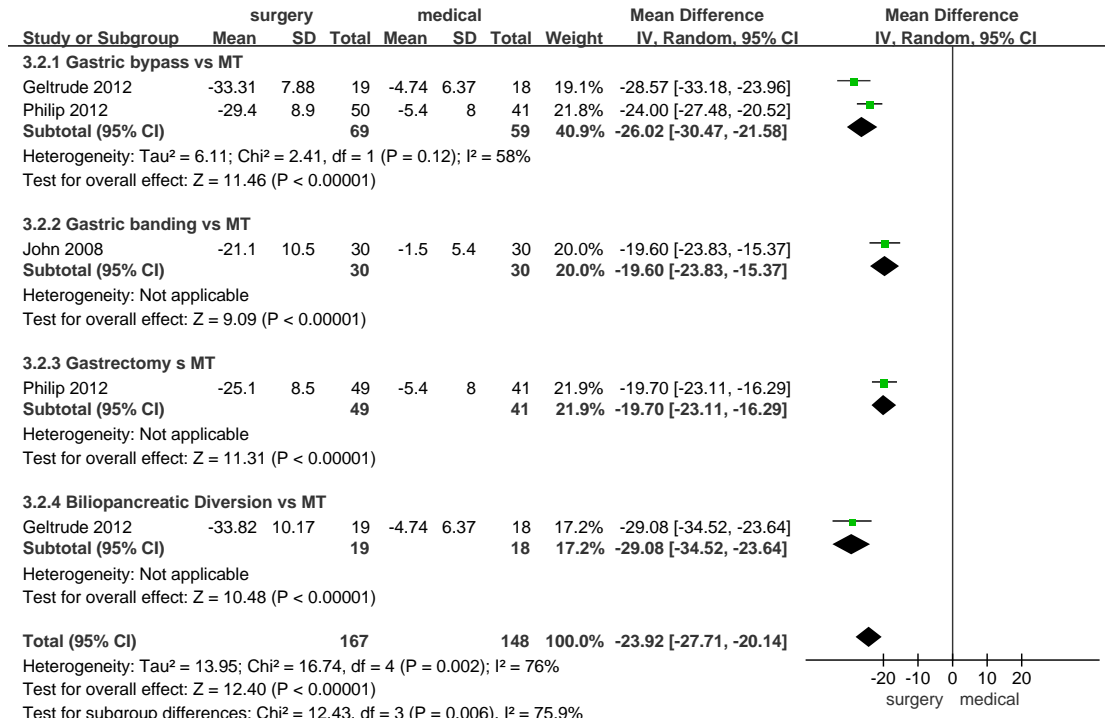

Fig. 7 Change of weight loss.

7

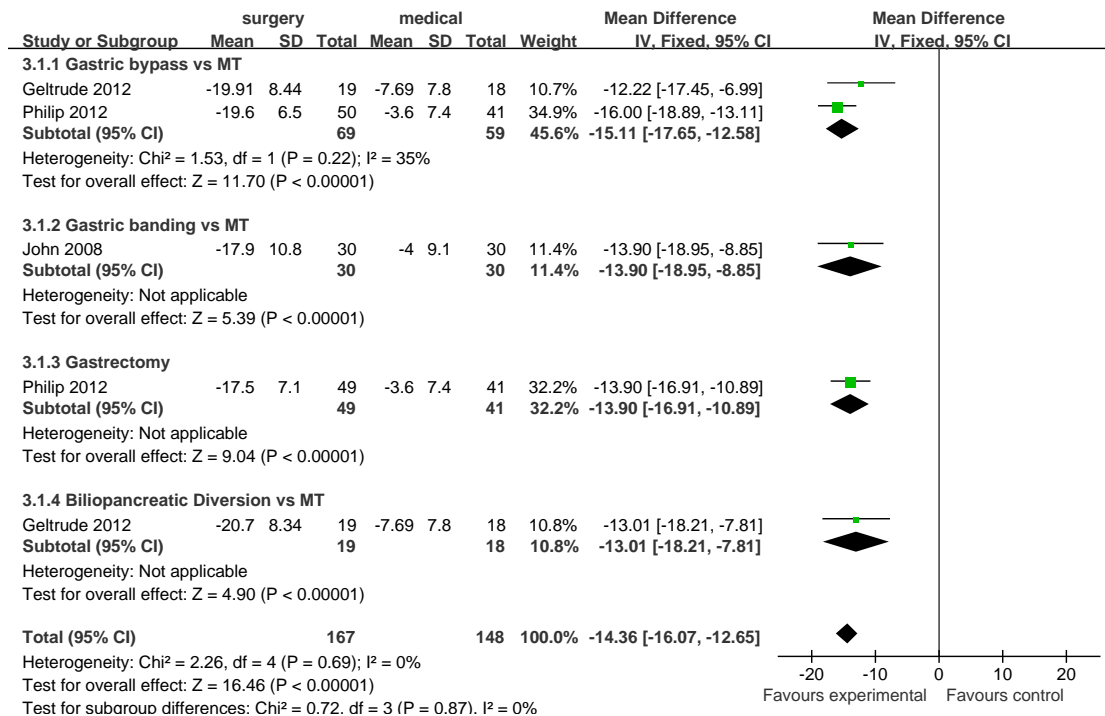

Fig. 8 Change of waist circumference

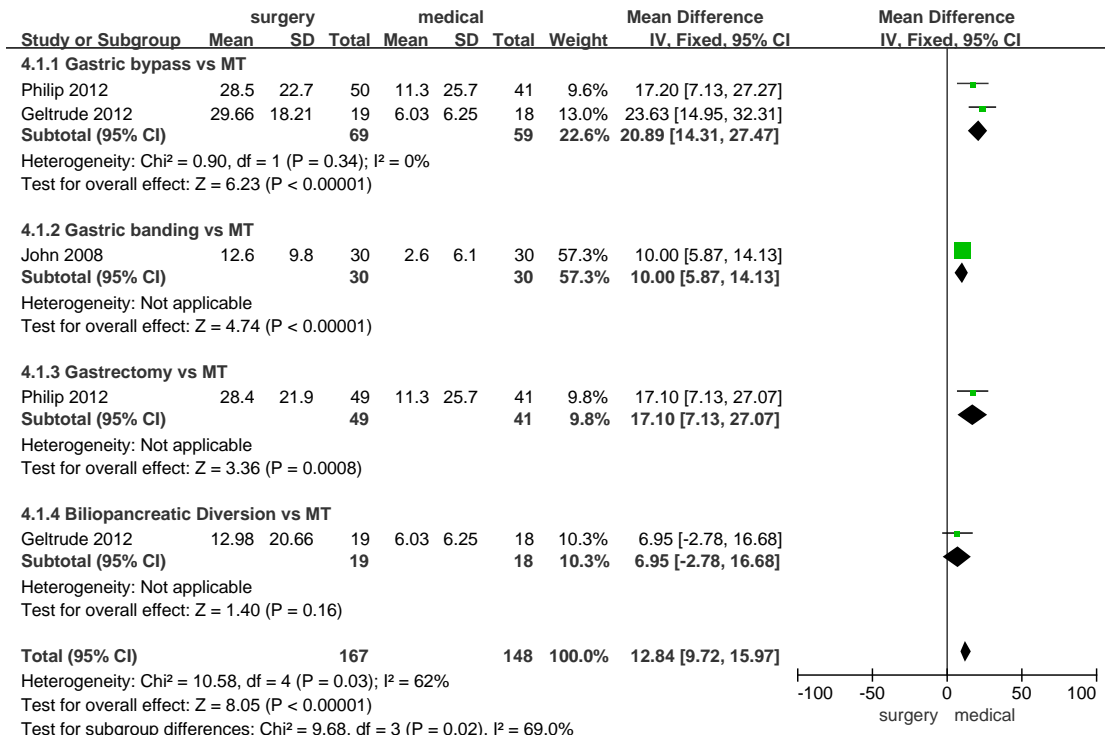

Fig. 9 High-density lipoprotein change.

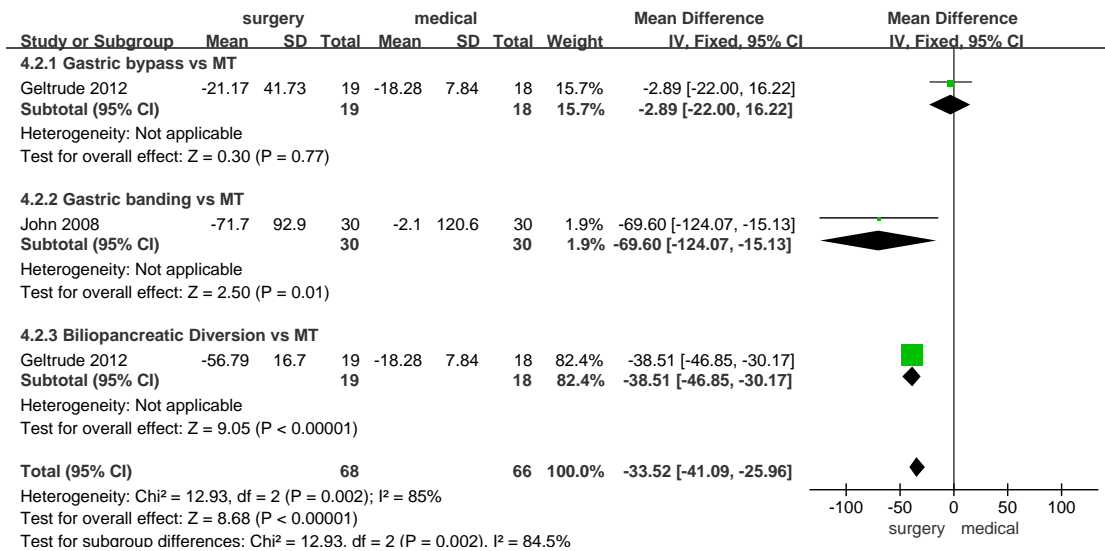

Fig. 10 Triglycerides change

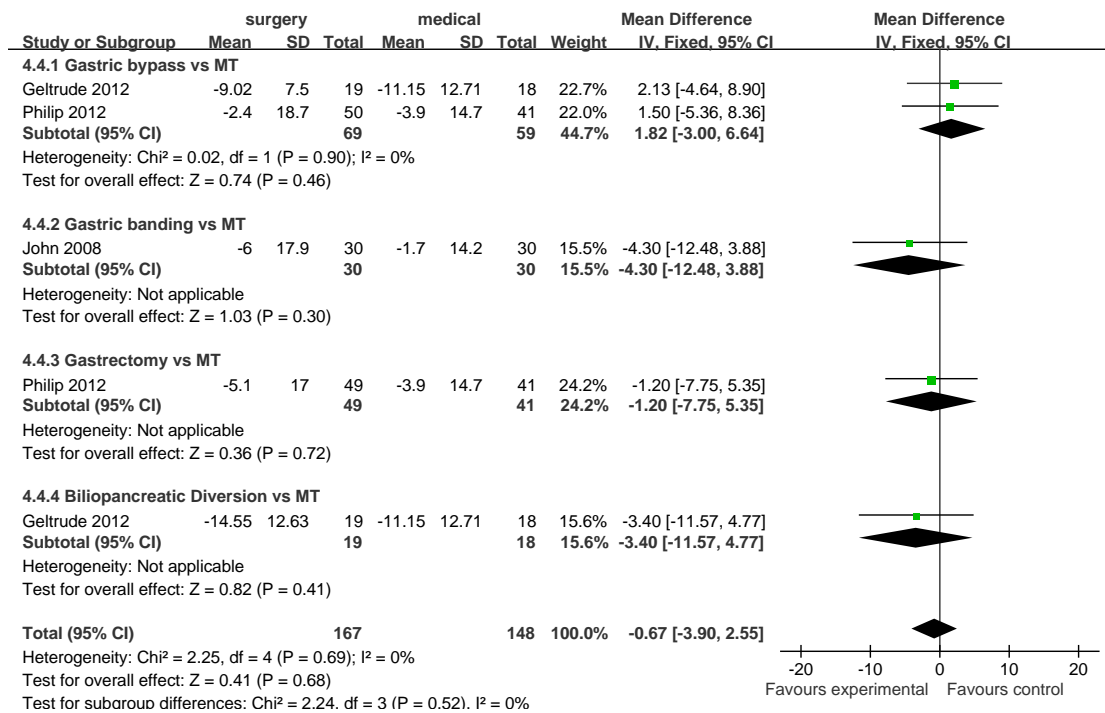

Fig. 11 Change of systolic blood pressure.

11

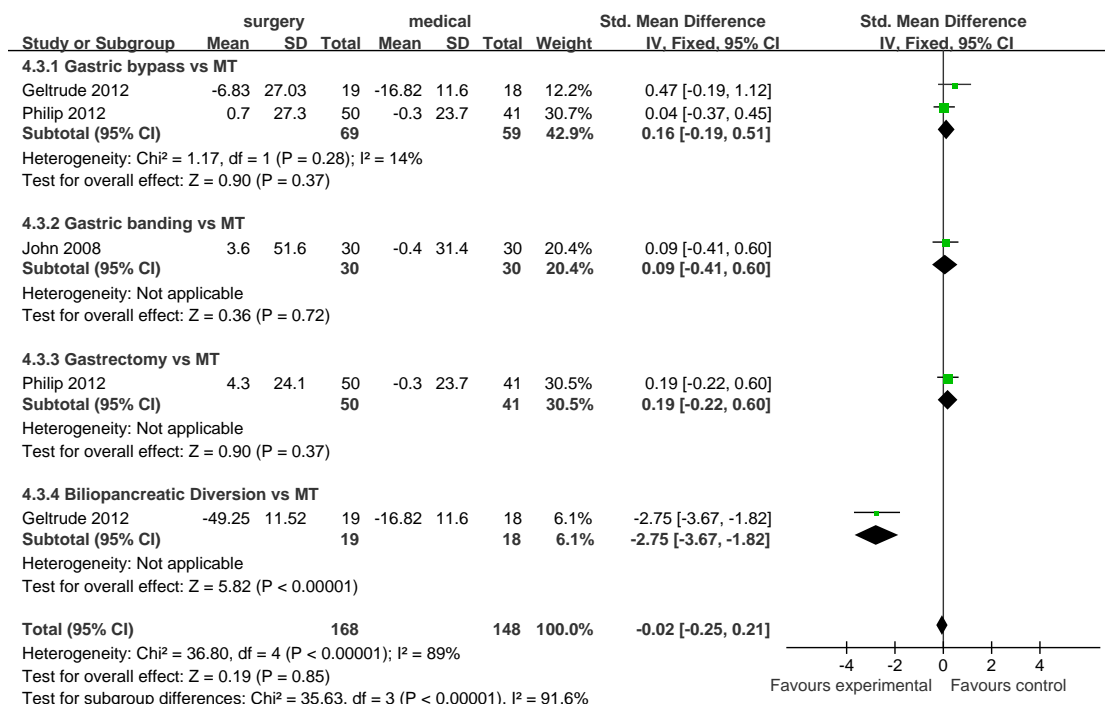

Fig 12 The change of total cholesterol.
